# Supplementary material for: Analyses of expressed sequence tags in Neurospora reveal rapid evolution of genes associated with the early stages of sexual reproduction in fungi
Source: PubMed Central journal article supplement (PMC3571971; doi:10.1186/1471-2148-12-229), 2012-11-27
Supplement: 1471-2148-12-229-S1.pdf [file 1471-2148-12-229-S1.pdf]

| Gene     | dN/dS above average |     |     |     |     | <i>N. crassa</i> annotation information |        |        |         |         |                                          |
|----------|---------------------|-----|-----|-----|-----|-----------------------------------------|--------|--------|---------|---------|------------------------------------------|
|          | global              | dis | int | cra | tet | Gene category                           | Length | LG     | Start   | Stop    | Gene Name                                |
| NCU00042 | x                   | x   |     |     |     | constitutive                            | 1285   | LG III | 2381584 | 2382868 | selenoprotein domain-containing protein  |
| NCU00052 | x                   |     |     |     |     | constitutive                            | 2290   | LG III | 2418803 | 2421092 | alpha-methylacyl-CoA racemase            |
| NCU00127 | x                   | x   |     | x   |     | constitutive                            | 2706   | LG III | 2716885 | 2719590 | hypothetical protein                     |
| NCU00138 | x                   | x   | x   | x   | x   | constitutive                            | 3378   | LG III | 2752660 | 2756037 |                                          |
| NCU00167 | x                   | x   |     |     |     | constitutive                            | 2731   | LG III | 2867149 | 2869879 | hypothetical protein                     |
| NCU00244 | x                   |     |     |     |     | constitutive                            | 1579   | LG III | 3154187 | 3155765 | glycosyl transferase                     |
| NCU00401 | x                   | x   | x   |     |     | vegetative                              | 2224   | LG III | 3729613 | 3731836 | hypothetical protein                     |
| NCU00434 |                     | x   |     |     |     | constitutive                            | 2791   | LG III | 3847356 | 3850146 | protein phosphatase 2C isoform beta      |
| NCU00458 | x                   | x   |     | x   |     | n/a                                     | 1364   | LG III | 3927960 | 3929323 | hypothetical protein                     |
| NCU00486 | x                   | x   | x   |     |     | constitutive                            | 3981   | LG III | 4023237 | 4027217 | hypothetical protein                     |
| NCU00517 | x                   | x   |     |     |     | n/a                                     | 2893   | LG I   | 8147689 | 8150581 | cell cycle checkpoint protein RAD17      |
| NCU00634 | x                   |     |     |     |     | constitutive                            | 1371   | LG I   | 7746371 | 7747741 | ribosomal protein L14                    |
| NCU00716 |                     | x   |     |     |     | reproductive                            | 1147   | LG I   | 7452365 | 7453511 | non-anchored cell wall protein-5         |
| NCU00761 |                     |     |     |     | x   | constitutive                            | 1754   | LG I   | 7274308 | 7276061 | triacylglycerol lipase                   |
| NCU00774 | x                   | x   | x   |     | x   | constitutive                            | 1635   | LG I   | 7217862 | 7219496 | hypothetical protein                     |
| NCU00821 |                     |     | x   |     |     | constitutive                            | 2285   | LG I   | 7056000 | 7058284 | sugar transporter                        |
| NCU00923 | x                   | x   |     |     |     | constitutive                            | 2090   | LG I   | 6710795 | 6712884 | hypothetical protein                     |
| NCU00926 | x                   | x   | x   | x   |     | n/a                                     | 2612   | LG I   | 6703376 | 6705987 | hypothetical protein                     |
| NCU00938 | x                   | x   |     |     |     | constitutive                            | 2064   | LG I   | 6663511 | 6665574 | hypothetical protein                     |
| NCU00984 | x                   | x   |     |     |     | n/a                                     | 3634   | LG I   | 6493485 | 6497118 | von Willebrand domain-containing protein |
| NCU00985 | x                   |     |     |     |     | constitutive                            | 2289   | LG I   | 6488910 | 6491198 | hydrolase                                |
| NCU00992 | x                   | x   | x   | x   |     | constitutive                            | 1720   | LG I   | 6466804 | 6468523 | hypothetical protein                     |
| NCU01106 | x                   | x   | x   |     |     | constitutive                            | 2162   | LG V   | 2936025 | 2938186 | L-amino acid oxidase                     |
| NCU01123 | x                   | x   |     |     |     | vegetative                              | 1593   | LG V   | 2972222 | 2973814 | hypothetical protein                     |
| NCU01195 | x                   |     | x   |     |     | constitutive                            | 1907   | LG V   | 3200932 | 3202838 | amination-deficient                      |
| NCU01199 |                     |     |     | x   |     | constitutive                            | 1303   | LG V   | 3218922 | 3220224 | SNARE domain-containing protein          |
| NCU01202 | x                   |     |     |     |     | constitutive                            | 1506   | LG V   | 3223676 | 3225181 | hypothetical protein                     |
| NCU01270 | x                   |     |     |     |     | n/a                                     | 1716   | LG V   | 3468143 | 3469858 | ribose-phosphate pyrophosphokinase II    |
| NCU01294 | x                   | x   |     |     |     | n/a                                     | 3628   | LG V   | 3553367 | 3556994 | hydrolase                                |
| NCU01309 |                     | x   |     |     |     | vegetative                              | 2123   | LG V   | 3598720 | 3600842 | hypothetical protein                     |
| NCU01418 | x                   |     |     |     |     | constitutive                            | 1617   | LG V   | 4007703 | 4009319 | clock-controlled gene-6                  |
| NCU01449 | x                   |     | x   |     |     | n/a                                     | 3089   | LG V   | 4705718 | 4708806 | GTP cyclohydrolase II                    |

|          |   |   |   |              |             |         |         |                                                   |
|----------|---|---|---|--------------|-------------|---------|---------|---------------------------------------------------|
| NCU01559 | x |   | x | constitutive | 1400 LG II  | 3086303 | 3087702 | hypothetical protein                              |
| NCU01668 | x |   | x | n/a          | 2417 LG II  | 2755579 | 2757995 | hypothetical protein                              |
| NCU01670 | x |   | x | constitutive | 1483 LG II  | 2750781 | 2752263 | type 1 phosphatase regulator ypi-1                |
| NCU01720 | x | x | x | reproductive | 2296 LG II  | 2644627 | 2646922 | hypothetical protein                              |
| NCU01781 | x | x | x | constitutive | 2463 LG II  | 2462714 | 2465176 | hypothetical protein                              |
| NCU01893 | x | x |   | constitutive | 2305 LG I   | 2121928 | 2124232 | hypothetical protein                              |
| NCU01932 |   |   | x | constitutive | 3938 LG I   | 1970961 | 1974898 | hypothetical protein                              |
| NCU01935 | x |   | x | n/a          | 2226 LG I   | 1959652 | 1961877 | palmitoyltransferase PFA5                         |
| NCU02024 | x |   | x | constitutive | 2062 LG I   | 1640137 | 1642198 | hypothetical protein                              |
| NCU02114 | x | x |   | constitutive | 3544 LG I   | 1232089 | 1235632 | G1/S-specific cyclin Cln1                         |
| NCU02125 | x | x |   | constitutive | 1159 LG I   | 1164048 | 1165206 | hypothetical protein                              |
| NCU02172 | x | x |   | constitutive | 4409 LG I   | 1002515 | 1006923 | hypothetical protein                              |
| NCU02187 | x | x | x | constitutive | 1943 LG I   | 928672  | 930614  | hypothetical protein                              |
| NCU02461 | x | x | x | constitutive | 1406 LG VII | 2148634 | 2150039 | hypothetical protein                              |
| NCU02526 |   | x |   | constitutive | 2059 LG I   | 2626204 | 2628262 | hypothetical protein                              |
| NCU02541 | x |   | x | constitutive | 2307 LG I   | 2671491 | 2673797 | oligosaccharyltransferase alpha subunit           |
| NCU02732 | x | x | x | constitutive | 2468 LG I   | 3358266 | 3360733 | hypothetical protein                              |
| NCU02745 | x |   | x | constitutive | 1918 LG I   | 3401488 | 3403405 | hypothetical protein                              |
| NCU02853 |   |   | x | vegetative   | 3361 LG I   | 8911982 | 8915342 | C2H2 type zinc finger domain-containing protein   |
| NCU02886 | x |   | x | constitutive | 1839 LG I   | 8803633 | 8805471 | hypothetical protein                              |
| NCU02916 | x | x |   | reproductive | 1148 LG I   | 8701896 | 8703043 | endoglucanase II                                  |
| NCU02979 |   |   | x | n/a          | 3527 LG I   | 8516237 | 8519763 | AMP deaminase                                     |
| NCU03013 | x | x |   | reproductive | 1346 LG I   | 8441217 | 8442562 | anchored cell wall protein-10                     |
| NCU03105 | x | x | x | constitutive | 1710 LG I   | 4579422 | 4581131 | hypothetical protein                              |
| NCU03153 |   | x |   | n/a          | 1826 LG I   | 4740988 | 4742813 | hypothetical protein                              |
| NCU03169 |   |   | x | n/a          | 2919 LG I   | 4777060 | 4779978 | hypothetical protein                              |
| NCU03179 | x | x | x | n/a          | 813 LG I    | 4817014 | 4817826 | hypothetical protein                              |
| NCU03191 | x | x | x | n/a          | 1769 LG I   | 4859024 | 4860792 | rab protein geranylgeranyltransferase component A |
| NCU03247 |   | x |   | reproductive | 2275 LG I   | 5049047 | 5051321 | hypothetical protein                              |
| NCU03284 | x |   | x | n/a          | 1798 LG I   | 5173916 | 5175713 | hypothetical protein                              |
| NCU03285 | x | x | x | n/a          | 2258 LG I   | 5176196 | 5178453 | hypothetical protein                              |
| NCU03336 | x | x |   | n/a          | 3693 LG II  | 1053305 | 1056997 | hypothetical protein                              |
| NCU03584 | x |   | x | reproductive | 7496 LG V   | 1714456 | 1721951 | polyketide synthase                               |
| NCU03681 | x |   |   | constitutive | 3154 LG V   | 2049418 | 2052571 | hypothetical protein                              |

| Gene     | dN/dS above average |     |     |     | <i>N. crassa</i> annotation information |               |        |        |         |         |                                              |
|----------|---------------------|-----|-----|-----|-----------------------------------------|---------------|--------|--------|---------|---------|----------------------------------------------|
|          | global              | dis | int | cra | tet                                     | Gene category | Length | LG     | Start   | Stop    | Gene Name                                    |
| NCU03694 | x                   | x   |     |     |                                         | n/a           | 2199   | LG V   | 2100199 | 2102397 | hypothetical protein                         |
| NCU03698 | x                   | x   | x   | x   |                                         | n/a           | 1843   | LG V   | 2115470 | 2117312 | hypothetical protein                         |
| NCU03714 | x                   |     | x   | x   |                                         | n/a           | 2187   | LG V   | 2180457 | 2182643 | thioredoxin                                  |
| NCU03741 |                     | x   |     |     |                                         | constitutive  | 2519   | LG V   | 2262588 | 2265106 | NAD kinase/ATP NAD kinase                    |
| NCU03755 | x                   |     |     |     | x                                       | constitutive  | 1718   | LG V   | 2313286 | 2315003 | flavin dependent monooxygenase               |
| NCU03793 | x                   |     |     | x   |                                         | constitutive  | 1991   | LG V   | 2434991 | 2436981 | hypothetical protein                         |
| NCU03810 | x                   | x   |     | x   |                                         | n/a           | 985    | LG V   | 2481632 | 2482616 | hypothetical protein                         |
| NCU03851 | x                   |     |     |     |                                         | constitutive  | 1437   | LG VI  | 2747393 | 2748829 | hypothetical protein                         |
| NCU03861 | x                   | x   |     | x   |                                         | reproductive  | 2955   | LG VI  | 2714126 | 2717080 | glutaminase A                                |
| NCU03868 | x                   | x   |     |     |                                         | vegetative    | 2390   | LG VI  | 2672208 | 2674597 | hypothetical protein                         |
| NCU03881 |                     | x   |     |     |                                         | vegetative    | 1494   | LG VI  | 2612139 | 2613632 | hypothetical protein                         |
| NCU03946 | x                   |     | x   |     |                                         | constitutive  | 2003   | LG VI  | 2429758 | 2431760 | polyadenylate-binding protein 2              |
| NCU04032 | x                   | x   |     | x   |                                         | constitutive  | 1121   | LG VI  | 2124626 | 2125746 | hypothetical protein                         |
| NCU04034 | x                   | x   |     |     |                                         | reproductive  | 1170   | LG VI  | 2119686 | 2120855 | hypothetical protein                         |
| NCU04063 | x                   |     | x   |     |                                         | constitutive  | 1555   | LG VI  | 2010361 | 2011915 | protein transporter sec-13                   |
| NCU04074 | x                   |     | x   |     |                                         | constitutive  | 1715   | LG VI  | 1977426 | 1979140 | NADH:ubiquinone oxidoreductase 30.4          |
| NCU04101 |                     | x   |     |     |                                         | constitutive  | 3192   | LG V   | 4827488 | 4830679 | WD domain-containing protein                 |
| NCU04119 |                     |     |     | x   |                                         | constitutive  | 1724   | LG V   | 4908983 | 4910706 | SNARE complex subunit                        |
| NCU04149 | x                   | x   |     |     |                                         | constitutive  | 1896   | LG V   | 5006504 | 5008399 | mitochondrial GTPase                         |
| NCU04343 | x                   | x   |     |     |                                         | constitutive  | 3927   | LG IV  | 3707178 | 3711104 | DUF323 domain-containing protein             |
| NCU04391 |                     | x   |     |     |                                         | constitutive  | 2478   | LG IV  | 3513120 | 3515597 | MFS aflatoxin efflux pump                    |
| NCU04421 | x                   |     |     |     |                                         | n/a           | 2255   | LG IV  | 3419585 | 3421839 | annexin 14                                   |
| NCU04558 | x                   | x   |     |     |                                         | n/a           | 2013   | LG VII | 2806028 | 2808040 | hypothetical protein                         |
| NCU04628 | x                   | x   | x   | x   |                                         | reproductive  | 3546   | LG V   | 1417820 | 1421365 | hypothetical protein                         |
| NCU04645 | x                   | x   |     |     |                                         | reproductive  | 2150   | LG V   | 1350526 | 1352675 | DUF124 domain-containing protein             |
| NCU04730 | x                   |     |     |     |                                         | reproductive  | 3239   | LG VI  | 574932  | 578170  | post-transcriptional silencing protein QDE-2 |
| NCU04731 | x                   | x   |     | x   |                                         | n/a           | 3482   | LG VI  | 581977  | 585458  | HLH transcription factor                     |
| NCU04757 | x                   | x   |     |     |                                         | constitutive  | 3519   | LG VI  | 690842  | 694360  | hypothetical protein                         |
| NCU04771 |                     |     | x   |     |                                         | constitutive  | 1960   | LG VI  | 760075  | 762034  | fructosyl-amino acid oxidase                 |
| NCU04795 | x                   |     |     |     |                                         | constitutive  | 2142   | LG VI  | 847241  | 849382  | hypothetical protein                         |
| NCU04886 | x                   | x   | x   |     |                                         | constitutive  | 1854   | LG IV  | 630732  | 632585  | MFS multidrug transporter                    |
| NCU04930 |                     | x   |     |     |                                         | vegetative    | 1982   | LG IV  | 777611  | 779592  | hypothetical protein                         |

|          |   |   |   |              |             |         |         |                                                |
|----------|---|---|---|--------------|-------------|---------|---------|------------------------------------------------|
| NCU04994 | x |   |   | n/a          | 1371 LG VI  | 4154030 | 4155400 | leucine aminopeptidase 2                       |
| NCU05057 |   | x |   | reproductive | 1389 LG VI  | 3894456 | 3895844 | endoglucanase EG-1                             |
| NCU05191 | x | x |   | reproductive | 1364 LG IV  | 5806268 | 5807631 | hypothetical protein                           |
| NCU05271 | x |   |   | constitutive | 4199 LG IV  | 5510612 | 5514810 | hypothetical protein                           |
| NCU05299 |   | x |   | vegetative   | 1335 LG IV  | 5418374 | 5419708 | NADH:ubiquinone oxidoreductase 29.9            |
| NCU05386 |   | x |   | constitutive | 2209 LG II  | 1483555 | 1485763 | hypothetical protein                           |
| NCU05508 | x |   | x | constitutive | 1263 LG VI  | 1679248 | 1680510 | hypothetical protein                           |
| NCU05569 | x | x |   | constitutive | 807 LG VI   | 1478617 | 1479423 | hypothetical protein                           |
| NCU05585 |   | x |   | constitutive | 2319 LG VI  | 1422875 | 1425193 | MFS quinate transporter                        |
| NCU05735 | x | x |   | constitutive | 1997 LG III | 679909  | 681905  | membrane transporter                           |
| NCU05764 | x | x | x | constitutive | 1173 LG VII | 513445  | 514617  | hypothetical protein                           |
| NCU05767 | x |   |   | n/a          | 2052 LG VII | 497025  | 499076  | PRO1A C6 Zink-finger protein                   |
| NCU05861 | x | x |   | reproductive | 5000 LG VII | 161883  | 166882  | hypothetical protein                           |
| NCU05870 | x | x |   | constitutive | 1826 LG VII | 138805  | 140630  | hypothetical protein                           |
| NCU06029 | x | x |   | constitutive | 1516 LG VII | 2215464 | 2216979 | hypothetical protein                           |
| NCU06116 | x | x |   | constitutive | 934 LG VII  | 2503747 | 2504680 | hypothetical protein                           |
| NCU06213 | x |   | x | constitutive | 2338 LG III | 1924734 | 1927071 | MIZ zinc finger protein                        |
| NCU06245 | x | x |   | constitutive | 2738 LG III | 2027776 | 2030513 | phospholipase C-1                              |
| NCU06247 | x | x | x | constitutive | 4518 LG III | 2033651 | 2038168 | hypothetical protein                           |
| NCU06250 | x | x |   | constitutive | 2943 LG III | 2054183 | 2057125 | F-box/LRR repeat containing protein 2          |
| NCU06256 | x | x |   | constitutive | 1874 LG III | 2088895 | 2090768 | phosphoglycerate mutase                        |
| NCU06353 | x |   | x | constitutive | 980 LG IV   | 2809289 | 2810268 | hypothetical protein                           |
| NCU06373 | x | x |   | constitutive | 2555 LG IV  | 2747711 | 2750265 | hypothetical protein                           |
| NCU06387 | x | x |   | reproductive | 1822 LG IV  | 2685168 | 2686989 | hypothetical protein                           |
| NCU06406 | x | x | x | constitutive | 2913 LG III | 1278420 | 1281332 | hypothetical protein                           |
| NCU06413 | x | x |   | vegetative   | 3101 LG III | 1314200 | 1317300 | hypothetical protein                           |
| NCU06506 | x | x | x | constitutive | 2533 LG III | 1673492 | 1676024 | hypothetical protein                           |
| NCU06536 | x | x |   | constitutive | 3897 LG IV  | 1561042 | 1564938 | hypothetical protein                           |
| NCU06602 | x | x |   | n/a          | 1554 LG IV  | 1771482 | 1773035 | hypothetical protein                           |
| NCU06626 |   |   | x | n/a          | 5067 LG IV  | 1845214 | 1850280 | phosphoinositide 3-kinase regulatory subunit 4 |
| NCU06633 | x |   |   | n/a          |             |         |         |                                                |
| NCU06707 | x | x |   | n/a          | 2853 LG V   | 4345793 | 4348645 | hypothetical protein                           |
| NCU06842 | x |   |   | n/a          | 4250 LG II  | 1787433 | 1791682 | RCM-1                                          |
| NCU07003 | x | x |   | constitutive | 2384 LG IV  | 4851982 | 4854365 | hypothetical protein                           |

| Gene     | dN/dS above average |     |     |     |     | <i>N. crassa</i> annotation information |        |        |         |         |                                                   |
|----------|---------------------|-----|-----|-----|-----|-----------------------------------------|--------|--------|---------|---------|---------------------------------------------------|
|          | global              | dis | int | cra | tet | Gene category                           | Length | LG     | Start   | Stop    | Gene Name                                         |
| NCU07005 | x                   | x   |     |     |     | constitutive                            | 1402   | LG IV  | 4865227 | 4866628 | glycosyl hydrolase                                |
| NCU07017 | x                   | x   |     | x   |     | constitutive                            | 1649   | LG IV  | 4920186 | 4921834 | hypothetical protein                              |
| NCU07020 |                     | x   | x   |     |     | constitutive                            | 2324   | LG IV  | 4931688 | 4934011 | vacuolar protein sorting-associated protein vps17 |
| NCU07022 | x                   |     |     |     |     | vegetative                              | 1505   | LG IV  | 4941065 | 4942569 | sorbitol dehydrogenase                            |
| NCU07063 |                     | x   |     |     |     | constitutive                            | 1821   | LG VI  | 297396  | 299216  | hypothetical protein                              |
| NCU07197 |                     |     |     |     | x   | n/a                                     | 1042   | LG V   | 6270438 | 6271479 | arsenate reductase                                |
| NCU07311 | x                   |     | x   | x   |     | reproductive                            | 1353   | LG IV  | 4415379 | 4416731 | hypothetical protein                              |
| NCU07352 |                     | x   |     |     |     | reproductive                            | 1850   | LG I   | 6272683 | 6274532 | hypothetical protein                              |
| NCU07368 |                     |     | x   |     |     | n/a                                     | 1577   | LG I   | 6195506 | 6197082 | hypothetical protein                              |
| NCU07405 | x                   | x   |     |     |     | constitutive                            | 2169   | LG I   | 6048250 | 6050418 | hypothetical protein                              |
| NCU07477 | x                   | x   |     | x   |     | constitutive                            | 3871   | LG I   | 494663  | 498533  | hypothetical protein                              |
| NCU07622 | x                   | x   |     |     |     | constitutive                            | 1953   | LG IV  | 303749  | 305701  | hypothetical protein                              |
| NCU07706 | x                   | x   |     |     |     | constitutive                            |        |        |         |         |                                                   |
| NCU07743 | x                   | x   | x   |     |     | reproductive                            | 2944   | LG V   | 455167  | 458110  | hypothetical protein                              |
| NCU07788 | x                   | x   |     |     |     | constitutive                            | 2935   | LG V   | 287303  | 290237  | fungus specific transcription factor              |
| NCU07822 | x                   | x   | x   |     |     | n/a                                     | 1026   | LG III | 984188  | 985213  | hypothetical protein                              |
| NCU07869 |                     | x   |     |     |     | constitutive                            | 2479   | LG III | 1177430 | 1179908 | INSIG domain-containing protein                   |
| NCU07883 | x                   | x   |     |     |     | constitutive                            | 2404   | LG III | 1228386 | 1230789 | hypothetical protein                              |
| NCU07888 | x                   | x   |     |     |     | reproductive                            | 1305   | LG III | 1240284 | 1241588 | hypothetical protein                              |
| NCU07925 | x                   | x   |     |     |     | n/a                                     | 1549   | LG IV  | 1331443 | 1332991 | LRP16                                             |
| NCU07974 | x                   | x   |     |     |     | constitutive                            | 2217   | LG IV  | 3772956 | 3775172 | endoglucanase B                                   |
| NCU08136 | x                   | x   |     | x   |     | n/a                                     | 3105   | LG VII | 757665  | 760769  | hypothetical protein                              |
| NCU08347 |                     | x   |     |     |     | constitutive                            | 1848   | LG I   | 5675133 | 5676980 | hypothetical protein                              |
| NCU08379 | x                   | x   |     |     |     | constitutive                            | 1312   | LG I   | 5552705 | 5554016 | hypothetical protein                              |
| NCU08435 | x                   | x   | x   | x   | x   | reproductive                            | 4357   | LG II  | 4057221 | 4061577 | RNA-dependent RNA polymerase                      |
| NCU08526 | x                   | x   |     |     |     | n/a                                     | 2205   | LG III | 5043330 | 5045534 | hypothetical protein                              |
| NCU08663 | x                   |     | x   |     |     | constitutive                            | 1945   | LG IV  | 4181867 | 4183811 | nonsense-mediated mRNA decay protein 3            |
| NCU08691 | x                   | x   |     |     |     | constitutive                            | 1457   | LG IV  | 4082383 | 4083839 | EF-hand calcium-binding domain-containing protein |
| NCU08719 | x                   |     |     |     |     | n/a                                     | 1761   | LG II  | 3788709 | 3790469 | glutamyl-tRNA(Gln) amidotransferase subunit A     |
| NCU08806 | x                   | x   | x   |     |     | n/a                                     | 1756   | LG IV  | 5187850 | 5189605 | hypothetical protein                              |
| NCU08903 | x                   | x   |     |     |     | constitutive                            | 1339   | LG V   | 695988  | 697326  | Nop10 family nucleolar RNA-binding protein        |
| NCU08977 | x                   | x   |     |     |     | constitutive                            | 3005   | LG III | 4112206 | 4115210 | long chain fatty alcohol oxidase                  |

|          |   |   |   |   |              |             |         |         |                                              |
|----------|---|---|---|---|--------------|-------------|---------|---------|----------------------------------------------|
| NCU08986 | x | x |   |   | reproductive | 827 LG III  | 4138036 | 4138862 | hypothetical protein                         |
| NCU09018 | x | x |   |   | constitutive | 1318 LG III | 4253696 | 4255013 | glutaminy-peptide cyclotransferase           |
| NCU09045 | x | x | x | x | constitutive | 2463 LG VII | 3819624 | 3822086 | heterokaryon incompatibility protein         |
| NCU09049 |   | x |   |   | reproductive | 1286 LG VII | 3801631 | 3802916 | hypothetical protein                         |
| NCU09099 | x | x |   |   | reproductive | 1301 LG I   | 851721  | 853021  | hypothetical protein                         |
| NCU09113 | x | x |   |   | constitutive |             |         |         |                                              |
| NCU09133 | x | x |   |   | vegetative   | 1825 LG I   | 5449901 | 5451725 | hypothetical protein                         |
| NCU09136 | x | x |   |   | constitutive | 1841 LG I   | 5459096 | 5460936 | hypothetical protein                         |
| NCU09139 | x |   |   |   | constitutive | 2289 LG I   | 5465780 | 5468068 | tubulin-specific chaperone                   |
| NCU09171 |   | x |   |   | reproductive | 2248 LG III | 241501  | 243748  | hypothetical protein                         |
| NCU09207 | x | x | x |   | constitutive | 3507 LG I   | 5838186 | 5841692 | hypothetical protein                         |
| NCU09241 | x |   |   |   | constitutive | 3045 LG I   | 9439555 | 9442599 | hypothetical protein                         |
| NCU09333 | x |   | x |   | n/a          | 2946 LG I   | 4198139 | 4201084 | zinc finger transcription factor ace1        |
| NCU09357 |   |   | x |   | reproductive | 7454 LG II  | 4231023 | 4238476 | stage V sporulation protein K                |
| NCU09362 | x | x |   |   | n/a          | 3063 LG I   | 3592036 | 3595098 | hypothetical protein                         |
| NCU09365 | x | x |   | x | constitutive | 2520 LG I   | 3583031 | 3585550 | hypothetical protein                         |
| NCU09375 | x |   |   | x | constitutive | 1550 LG I   | 3530171 | 3531720 | hypothetical protein                         |
| NCU09466 | x | x |   | x | n/a          | 1723 LG II  | 4371194 | 4372916 | hypothetical protein                         |
| NCU09517 |   |   |   | x | vegetative   | 1351 LG III | 35785   | 37135   | hypothetical protein                         |
| NCU09575 | x | x |   |   | reproductive | 2407 LG VII | 3300200 | 3302606 | sterol esterase                              |
| NCU09647 |   | x |   |   | n/a          | 1503 LG IV  | 59748   | 61250   | hypothetical protein                         |
| NCU09656 | x | x |   |   | n/a          | 1629 LG IV  | 85773   | 87401   | carboxymethylenebutenolidase                 |
| NCU09715 |   |   | x |   | constitutive | 2407 LG VII | 2875788 | 2878194 | alpha,alpha-trehalose-phosphate synthase     |
| NCU09760 | x | x |   | x | n/a          | 4436 LG II  | 4317404 | 4321839 | hypothetical protein                         |
| NCU09812 | x |   | x | x | constitutive | 2927 LG I   | 4131500 | 4134426 | LIM domain-containing protein                |
| NCU09881 | x | x |   |   | constitutive | 1841 LG I   | 6356249 | 6358089 | hypothetical protein                         |
| NCU09929 | x |   |   |   | constitutive | 1690 LG IV  | 5272027 | 5273716 | hypothetical protein                         |
| NCU09994 | x | x | x |   | n/a          | 2346 LG I   | 3677688 | 3680033 | hypothetical protein                         |
| NCU10034 |   | x |   |   | n/a          | 1201 LG II  | 3359193 | 3360393 | retrograde vesicle-mediated transporter Get1 |
| NCU10073 | x | x |   |   | n/a          | 2855 LG I   | 4040313 | 4043167 | actin binding protein                        |
| NCU10430 | x | x |   |   | constitutive | 1389 LG II  | 2111818 | 2113206 | SNF7 family protein                          |
| NCU10476 | x | x |   | x | vegetative   | 3323 LG V   | 3525885 | 3529207 | hypothetical protein                         |
| NCU10618 |   |   |   | x | n/a          | 1859 LG V   | 1565139 | 1566997 | AP-1 complex subunit theta-1                 |
| NCU10789 | x |   |   | x | constitutive | 2910 LG I   | 2760976 | 2763885 | ubiquitin-protein ligase Sel1/Ubx2           |

| Gene     | dN/dS above average |            |            |                | <i>N. crassa</i> annotation information |        |        |         |         |                                   |
|----------|---------------------|------------|------------|----------------|-----------------------------------------|--------|--------|---------|---------|-----------------------------------|
|          | global              | <i>dis</i> | <i>int</i> | <i>cra tet</i> | Gene category                           | Length | LG     | Start   | Stop    | Gene Name                         |
| NCU10997 | x                   | x          |            |                | vegetative                              |        |        |         |         |                                   |
| NCU11065 | x                   |            | x          |                | n/a                                     |        |        |         |         |                                   |
| NCU11274 | x                   |            | x          |                | vegetative                              |        |        |         |         |                                   |
| NCU11312 | x                   | x          |            | x              | constitutive                            | 2921   | LG III | 1961297 | 1964217 | CorA family metal ion transporter |
| NCU11387 | x                   |            |            |                | constitutive                            |        |        |         |         |                                   |
| NCU11388 | x                   |            | x          | x              | n/a                                     |        |        |         |         |                                   |
