# Supplementary material for: Analyses of expressed sequence tags in Neurospora reveal rapid evolution of genes associated with the early stages of sexual reproduction in fungi
Source: PubMed Central journal article supplement (PMC3571971; doi:10.1186/1471-2148-12-229), 2012-11-27
Supplement: 1471-2148-12-229-S2.pdf [file 1471-2148-12-229-S2.pdf]

Supplementary Table 2. Candidate genes used to test for positive selection, and ID of additional heterothallic *Neurospora* strains sequenced. Accession numbers will be given upon acceptance of the manuscript.

| Species                            | Isolate code | Gene alignment |                       |                       |          |          |
|------------------------------------|--------------|----------------|-----------------------|-----------------------|----------|----------|
|                                    |              | NCU01720       | NCU03013 <sup>1</sup> | NCU03584 <sup>2</sup> | NCU06387 | NCU07311 |
| <i>N. crassa</i> (NcC)             | FGSC 8858    | -              | -                     | -                     | HE861791 | -        |
| <i>N. crassa</i> (NcC)             | FGSC 8863    | HE861780       | HE861803              | -                     | -        | HE861813 |
| <i>N. crassa</i> (NcB)             | FGSC 8772    | HE861774       | HE861797              | HE861766              | HE861785 | HE861809 |
| <i>N. discreta</i> (PS7)           | FGSC 8780    | HE861775       | HE861798              | -                     | HE861786 | -        |
| <i>N. discreta</i> (PS6)           | FGSC 8827    | HE861777       | HE861800              | -                     | HE861788 | -        |
| <i>N. hispaniola</i>               | FGSC 8815    | HE861776       | HE861799              | HE861767              | HE861787 | HE861810 |
| <i>N. intermedia</i> (NiA)         | FGSC 8901    | HE861782       | HE861805              | HE861770              | HE861793 | HE861815 |
| <i>N. intermedia</i> (NiB)         | FGSC 8768    | HE861773       | HE861796              | -                     | HE861784 | HE861808 |
| <i>N. metzenbergii</i>             | FGSC 8853    | HE861779       | HE861802              | -                     | HE861790 | HE861812 |
| <i>N. perkinsii</i>                | FGSC 8835    | HE861778       | HE861801              | HE861768              | HE861789 | HE861811 |
| <i>N. sitophila</i>                | FGSC 412     | HE861771       | HE861794              | -                     | HE861783 | HE861806 |
| Genome sequences                   |              |                |                       |                       |          |          |
| <i>N. crassa</i> <sup>3</sup>      |              | included       | included              | included              | included | included |
| <i>N. discreta</i> <sup>4</sup>    | FGSC 8579    | -              | -                     | included              | -        | included |
| <i>N. tetrasperma</i> <sup>5</sup> | FGSC 2508    | included       | included              | included              | included | included |

<sup>1</sup> acw-10 gene for anchored cell wall protein-10

<sup>2</sup> pks gene for polyketide synthase

<sup>3</sup> Neurospora crassa database, Broad Institute (<http://www.broadinstitute.org/annotation/genome/neurospora/MultiHome.html>)

<sup>4</sup> JGI, Neurospora discreta FGSC 8579 mat A (<http://genome.jgi-psf.org/Neudi1/Neudi1.home.html>)

<sup>5</sup> JGI, Neurospora tetrasperma FGSC 2508 mat A
