# Supplementary material for: Analyses of expressed sequence tags in Neurospora reveal rapid evolution of genes associated with the early stages of sexual reproduction in fungi
Source: PubMed Central journal article supplement (PMC3571971; doi:10.1186/1471-2148-12-229), 2012-11-27
Supplement: 1471-2148-12-229-S4.pdf [file 1471-2148-12-229-S4.pdf]

Supplementary Table 3. Primers used for PCR amplification of candidate genes for test for positive selection.

| Gene     | F-primer (5'...3')       | R-primer (5'...3')      |
|----------|--------------------------|-------------------------|
| NCU01720 | ATCACGTTGGCAAGAGGGACAT   | ACCCTCCGCAACCATGAAGTAG  |
| NCU03013 | TGCGTACCTCAGTAGCTCTTTCAC | CTGCAACAGGTAGTGTGCCTGAC |
| NCU03584 | TCCGAGTCCAATGTCACCACTC   | CAGGTACTCATCCCACCTGTTG  |
| NCU06387 | GCAAGCAGCAAAGGAACAGAAC   | AAGCTCCATCGACTCTTCTTCG  |
| NCU07311 | CTGTTGGAGTCCCTCCATTTC    | GGAGGAAGCTCATTAGCAGTGG  |
